# Supplementary material for: One-step fabrication of a laser-induced forward transfer graphene/CuxO nanocomposite-based electrocatalyst to promote hydrogen evolution reaction
Source: Royal Society of Chemistry journal article supplement (doi:10.1039/d1ta01267c), 2021-01-01
Supplement: d1ta01267c1.pdf [file d1ta01267c1.pdf]

**One-step fabrication of laser induced forward transfer graphene/Cu<sub>x</sub>O  
nanocomposite based electrocatalyst to promote hydrogen  
evolution reaction**

Dan Xu <sup>a,c</sup> K. C. Chan <sup>b</sup> Hanjie Guo <sup>c</sup> Hong Zhong <sup>\*d</sup> Lin Lu <sup>\*a</sup>

<sup>a</sup> Department of Building Services Engineering, The Hong Kong Polytechnic University, Hong Kong 999077, P. R. China. Email: vivien.lu@polyu.edu.hk

<sup>b</sup> Advanced Manufacturing Technology Research Centre, Department of Industrial and Systems Engineering, Hong Kong Polytechnic University, Hong Kong 999077, P. R. China

<sup>c</sup> Songshan Lake Materials Laboratory, Dongguan, Guangdong 523808, P. R. China

<sup>d</sup> College of Electronic and Information Engineering, Shenzhen University, Shenzhen 518000, P. R. China. Email: auston.zhong@connect.polyu.hk

**Supporting Figures**

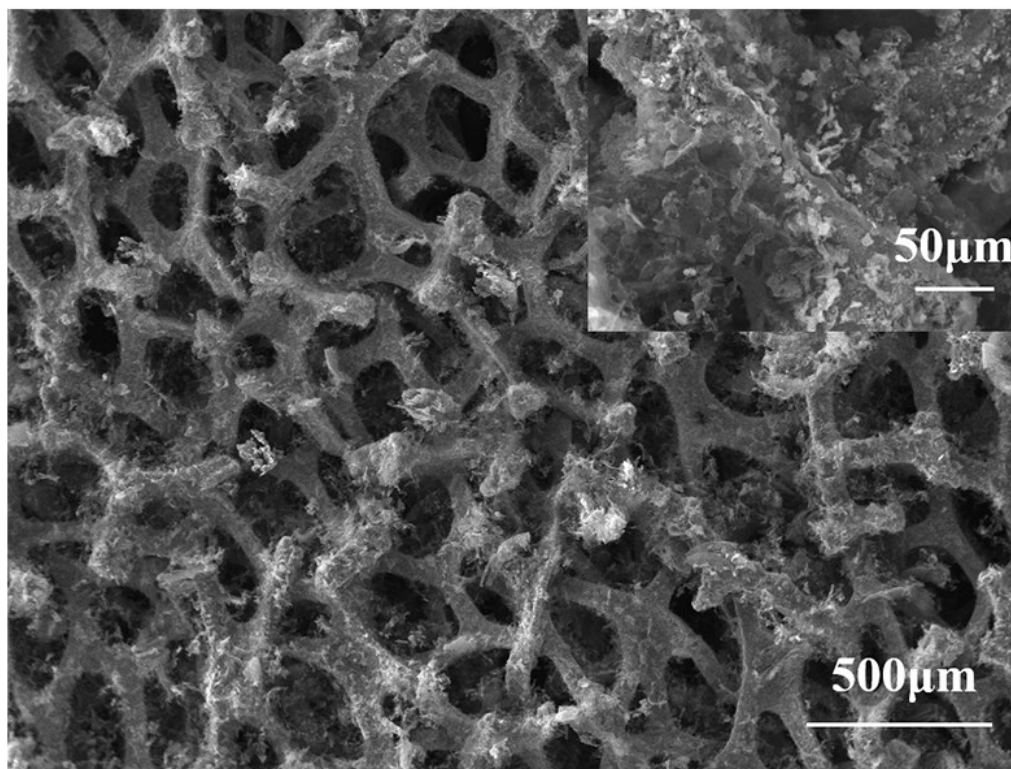

Figure S1. SEM images of the LIFT graphene/Cu<sub>x</sub>O @Ni foam.

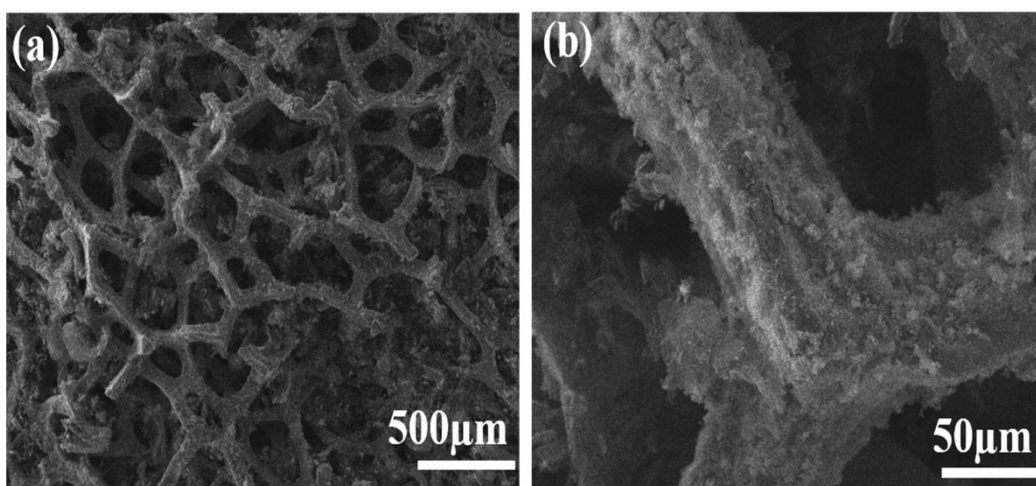

Figure S2. (a), (b) SEM images of the LIFT graphene/Cu<sub>x</sub>O @Ni foam after 1000 cycles CV test.

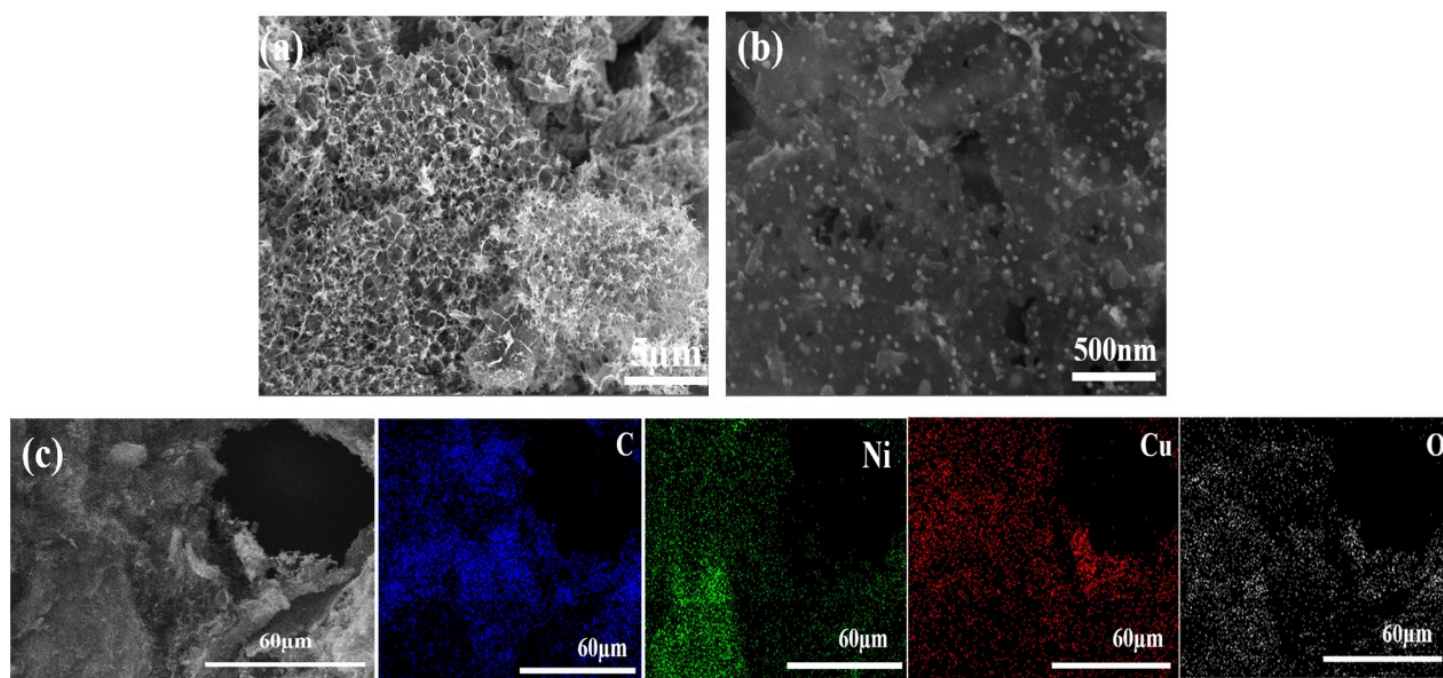

Figure S3. (a), (b) FESEM images of the porous LIFT graphene wrapped Cu<sub>x</sub>O after 1000 cycles CV test.  
 (c) EDX mapping of the LIFT graphene wrapped Cu<sub>x</sub>O after 1000 cycles CV test.

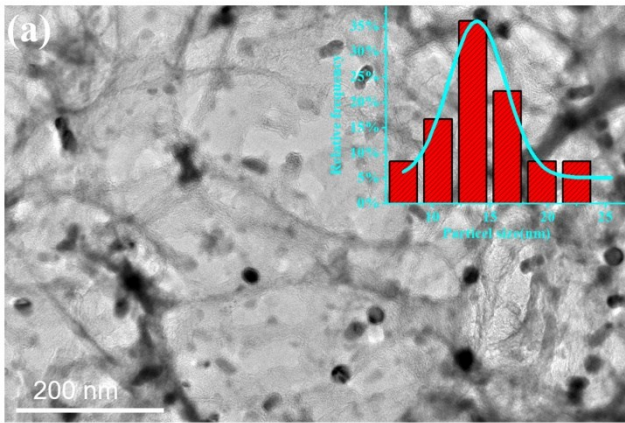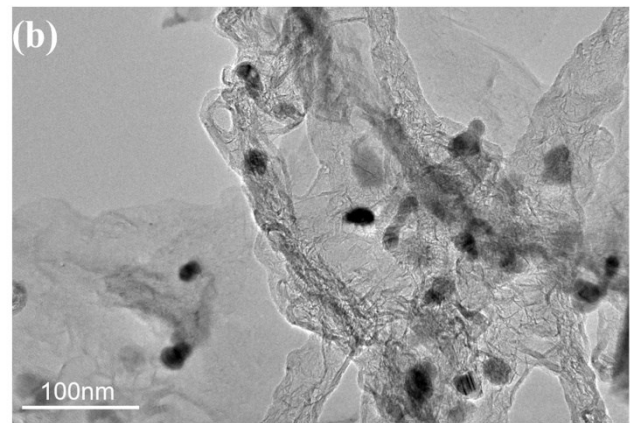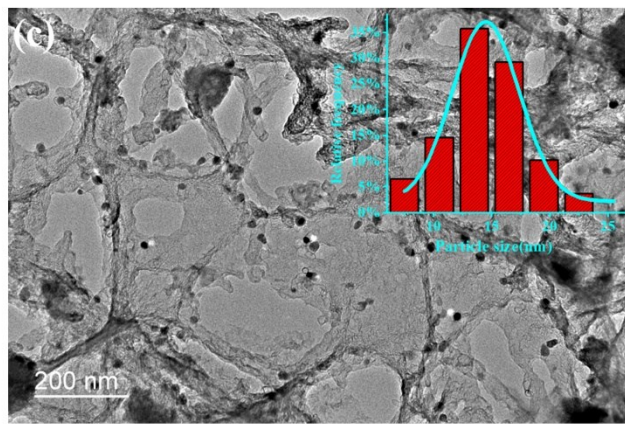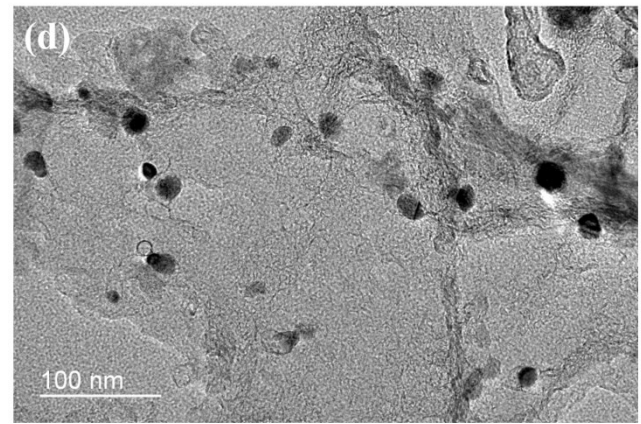

Figure S4. TEM images of (a), (b) initial LIFT graphene/ $\text{Cu}_x\text{O}$ , (c), (d) LIFT graphene/ $\text{Cu}_x\text{O}$  after 1000 cycles CV test.

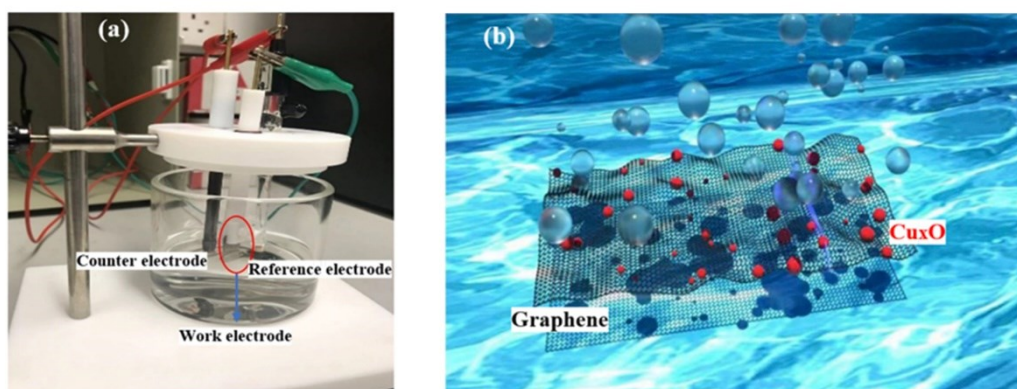

Figure S5. Pictures of (a) experiment set-up of the three-electrode: a graphite rod and a mercuric oxide electrode as the counter and reference electrode respectively, and (b) HER process in 1M KOH.

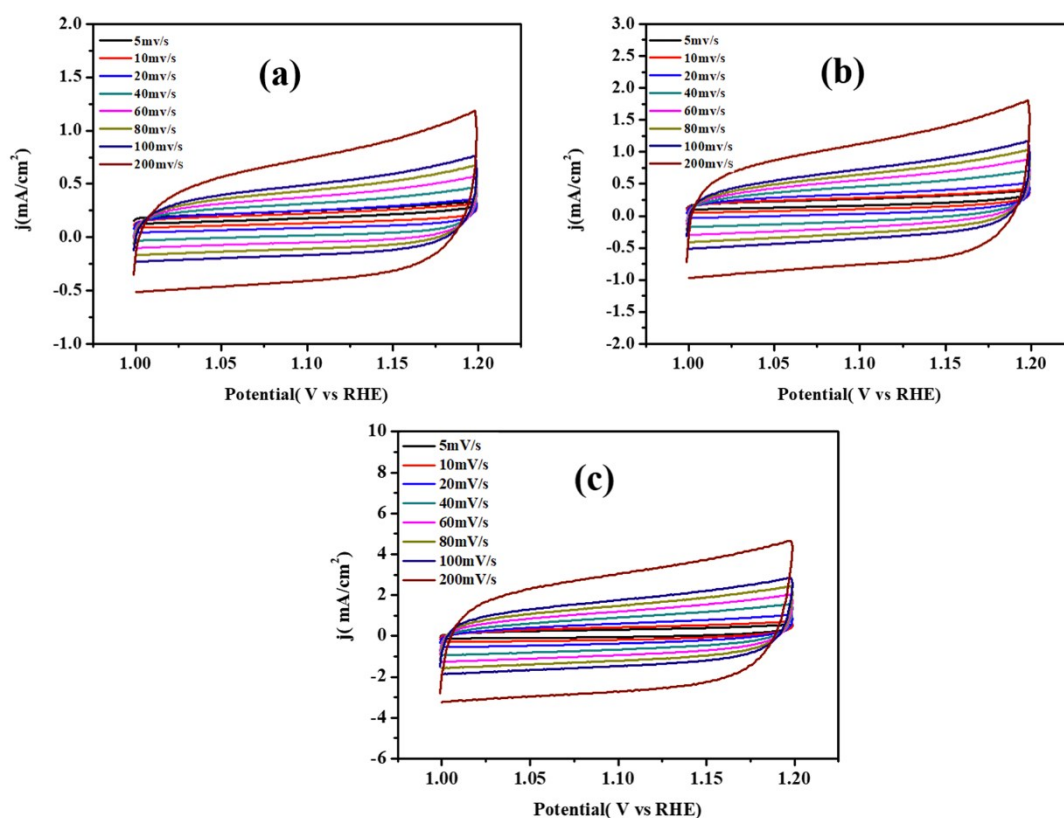

Figure S6. CV cures of bare Ni foam (a), LIFT graphene @Ni foam (b), and LIFT graphene/ $\text{Cu}_x\text{O}$  @Ni foam(c) at different scan rates.

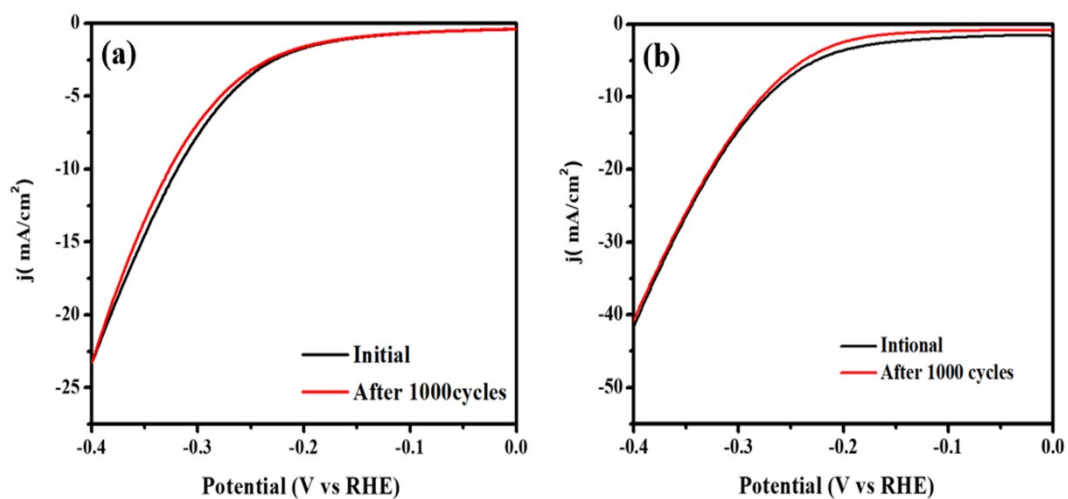

Figure S7. LSV curves for (a) initial bare Ni foam and after 1000 cycles CV tests, (b) initial LIFT graphene @Ni foam and after 1000 cycles CV tests

Table S1 Comparison of the HER performance of different Cu-based catalysts/electrodes obtained from different approaches.

| Catalyst/electrode                         | Electrolyte                         | $\eta(\text{mV})@j$<br>$\text{mA cm}^{-2}$ | Tafel<br>slope (mV<br>$\text{dec}^{-1}$ ) | Preparation method                                                                   | Reference                                                           |
|--------------------------------------------|-------------------------------------|--------------------------------------------|-------------------------------------------|--------------------------------------------------------------------------------------|---------------------------------------------------------------------|
| LIFT<br>Graphene/Cu <sub>x</sub> O/NiF     | 1M KOH                              | 149.6@10                                   | 157                                       | Laser deposition                                                                     | This work                                                           |
| Cu <sub>3</sub> P/CF                       | 1M KOH                              | 210@20                                     | 127                                       | Anodization/calcination<br>/Phosphorization                                          | J. Phys. Chem. C 2017,<br>121, 25875-25881                          |
| CuNPs/CNFs                                 | 0.5M H <sub>2</sub> SO <sub>4</sub> | 200@10                                     | 152                                       | CVD/carbonization/<br>electrospinning /<br>thermal reduction                         | International journal of<br>hydrogen energy<br>41(2016) 18044-18049 |
| CoP@Cu <sub>2</sub> P-Cu <sub>3</sub> P/GC | 1M KOH                              | 118@10                                     | 72                                        | two-step nanocasting-solid<br>phase phosphorization                                  | Sustainable Energy<br>Fuels<br>DOI:<br>10.1039/d0se01745k           |
| CuCo <sub>2</sub> Se <sub>4</sub>          | 1M KOH                              | 125@10                                     | --                                        | hydrothermal method                                                                  | ACS Appl. Energy<br>Mater. 2020, 3, 3092-<br>3103                   |
| CuO@Ni/NiFe<br>hydroxides                  | 1M KOH                              | 125@10                                     | 86                                        | chemical oxidation-calcination<br>/room-temperature interfacial<br>Galvanic reaction | Electrochimica Acta 318<br>(2019) 695-702                           |
| Cu <sub>3</sub> P@NF                       | 1M KOH                              | 105@10                                     | --                                        | Hydrothermal method<br>/phosphorization                                              | ACS Appl. Mater.<br>Interfaces 2017, 9, 2240-<br>2248               |
| Cu@NiFe LDH /CF                            | 1M KOH                              | 116@10                                     | 58.9                                      | chemical oxidation/air annealing<br>/electroreduction/electrodeposition              | Energy Environ. Sci.,<br>2017, 10, 1820--1827                       |
| Cu <sub>2</sub> S@Cu                       | 1M KOH                              | 316@10                                     | 76                                        | sulfurization reaction                                                               | International journal of<br>hydrogen energy<br>44(2019) 1620-1626   |
| CMS/Ni                                     | 1M KOH                              | 213@50                                     | 80                                        | hydrothermal method                                                                  | Mater. Adv., 2021, 2,<br>455-463                                    |
| Co-P/CuO CF                                | 1M KOH                              | 95@20                                      | --                                        | chemical oxidation/<br>Air annealing/<br>electrodeposition                           | Dalton Trans., 2019, 48,<br>891-897                                 |
| NiCoP@Cu <sub>3</sub> P/CF                 | 1M KOH                              | 54@10                                      | 72                                        | Chemical oxidation /hydrothermal<br>method                                           | J. Mater. Chem. A,<br>2018, 6, 2100-2106                            |
| Cu@CoFe LDH                                | 1M KOH                              | 171@10                                     | 36.4                                      | chemical oxidation                                                                   | Nano Energy 41 (2017)                                               |

|                                       |              |       |      |                                   |                                          |
|---------------------------------------|--------------|-------|------|-----------------------------------|------------------------------------------|
|                                       |              |       |      | /electrodeposition                | 327–336                                  |
| Copper-nickel-sulfide<br>NWS          | 1 M alkaline | 70@10 | 44   | multi-step wet chemistry strategy | Chem. Commun., 2019,<br>55, 8154--8157   |
| CuCo <sub>2</sub> S <sub>4</sub> TSAs | 1M KOH       | 69@10 | 55.4 | hydrothermal method               | J. Mater. Chem. A,<br>2020, 8, 1799–1807 |
